# Supplementary material for: Cytokinin transfer by a free-living mirid to Nicotiana attenuata recapitulates a strategy of endophytic insects
Source: eLife. 2018 Jul 17;7:e36268. doi: 10.7554/eLife.36268 (PMC6059766; doi:10.7554/eLife.36268)
Supplement: Supplementary file 3. [file elife-36268-supp3.docx]

Supplementary File 3. Multi-reaction monitoring settings for the quantification of [14N5]-, [15N5]- and deuterated cytokinins in positive ionization mode.

Analyte RT [min] Q1 [m/z] → Q3 [m/z]a,b CE [V]a Standardc

[15N5]-IP 5.12 (+)209.10 → 141.00 -14 D6-IP

[15N5]-IPR 6.14 (+)341.10 → 209.30 -12 D6-IPR

(+)341.10 → 141.00 -28

*c*Z 2.53 (+)220.20 → 136.30 -16 D5-*t*Z

(+)220.20 → 148.30 -16

*c*ZR 4.45 (+)352.20 → 220.30 -16 D5-*t*ZR

(+)352.20 → 136.00 -25

IP 5.18 (+)204.10 → 136.00 -14 D6-IP

IPR 6.10 (+)336.10 → 204.30 -12 D6-IPR

(+)336.10 → 136.50 -28

*t*Z 2.25 (+)220.20 → 136.30 -16 D5-*t*Z

(+)220.20 → 148.30 -16

*t*ZR 4.04 (+)352.20 → 220.30 -16 D5-*t*ZR

(+)352.20 → 136.00 -25

D6-IP 5.11 (+)210.10 → 137.00 -14

D6-IPR 6.04 (+)342.00 → 210.00 -12

(+)342.00 → 136.50 -28

D5-*t*Z 2.22 (+)225.20 → 136.60 -16

D5-*t*ZR 3.98 (+)357.20 → 225.50 -16

RT: retention time

CE: collision energy

a Qualifiers are depicted in grey

b Resolution: Q1: 0.7, Q3: 2
